## Post-translesion synthesis repair

Jacob G. Jansen, Anastasia Tsaalbi-Shtylik and Niels de Wind

Unrepaired DNA nucleotide lesions, derived from endogenous (radical oxygen species, base decay, etc.) or exogenous (sunlight, smoke, alcohol, etc.) sources can compromise cellular and organismal health. Cellular responses to DNA damage range from DNA damage responses (DDR) including checkpoints, senescence and apoptosis, to nucleotide substitutions and genomic rearrangements [1]. A common intermediate in all these responses are the lesion-containing single-stranded DNA (ssDNA) tracts that originate from the inability of replicative DNA polymerases to bypass damaged templates [2]. Persistent ssDNA tracts recruit the heterotrimeric RPA protein and the ATR/ATRIP DNA kinase that initiates DDR by phosphorylating various proteins, including the CHK1 DNA damage signaling kinase [1, 3]. When ssDNA tracts persist they are at risk to collapse into recombinogenic double-strand DNA breaks [2]. To avert the induction of DDR and of DSB, specialized DNA translesion synthesis (TLS) polymerases fill the lesion-containing ssDNA tracts. Unfortunately, TLS polymerases frequently insert an incorrect nucleotide opposite the damaged nucleotide, ultimately resulting in a nucleotide substitution. It is important, therefore, to keep TLS in check. Mechanisms that control TLS include the restricted recruitment of TLS polymerases, the selective expression or posttranslational modification of TLS

polymerases or, possibly, correction of TLS errors by the proofreading activity of the replicative polymerases [3].

We recently have unveiled a new mechanism that controls mutagenic TLS, and also DDR induction, in response to physiologically relevant DNA lesion densities [4]. This mechanism utilizes MutS $\alpha$ , a core component of the DNA mismatch repair (MMR) pathway. During canonical MMR, MutS $\alpha$  recognizes and binds misincorporations by the replicative DNA polymerases opposite normal or slightly modified nucleotides. This initiates a repair cascade that involves (i) MutL $\alpha$ -mediated incision of the nascent DNA strand, 5' of the mismatch, (ii) the exonucleolytic removal of the nascent DNA strand containing the misincorporation, and (iii) resynthesis [5]. Loss of MMR results in a spontaneous mutator phenotype that originates cancer in the human Lynch syndrome.

It has long been known that MMR proteins additionally are involved in provoking DDR to nucleotide lesions that severely disrupt the helical structure of DNA, including polycyclic aromatic hydrocarbons and ultraviolet (UV) light [6]. It has been hypothesized that this response reflects binding of MutS $\alpha$  and MutL $\alpha$  to damaged nucleotides, followed by the direct activation of the DDR machinery [5]. However, although MutS $\alpha$  and MutL $\alpha$  can indeed recruit ATR/ATRIP and CHK1, there is no good evidence in favor of the binding of MutS $\alpha$  to

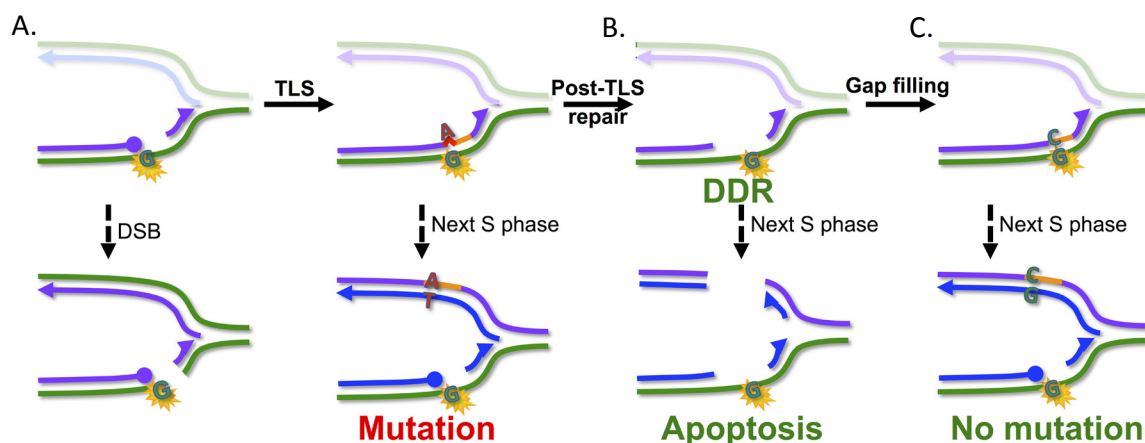

**Figure 1: Model for the induction of DDR and the suppression of mutations by post-TLS repair.** Error-prone TLS at distorting nucleotide lesions (red+orange tract in panel A) prevents the induction of DSBs and of DDR, at the price of incorrect incorporations that result in mutations during the S phase of the next cell cycle. Post TLS repair (panel B) excises the TLS error. The resulting ssDNA tract induces DDR. We hypothesize that, during the next S phase, the gapped template can collapse to a DSB, mediating a delayed apoptotic response. Error-free gap filling by TLS (panel C, orange tract) prevents the induction of a nucleotide substitution.

damaged nucleotides (at least outside of the context of replication). In addition to activating DDR, MutS $\alpha$  plays a second role in responses to nucleotide lesions: we found that UV light is considerably more mutagenic in MutS $\alpha$ -deficient cells than in wild type cells. This phenotype was not caused by a requirement of MutS $\alpha$  for optimal nucleotide excision repair (NER), the pathway that prevents mutagenesis by excising damaged nucleotides. Surprisingly, residual DNA incision activity in UV-treated NER-deficient cells was dependent on MutS $\alpha$ . By staining for photolesions, embedded in ssDNA we demonstrated that MutS $\alpha$  directs excision of the undamaged DNA strand opposite to the photolesion. The resulting ssDNA tracts with embedded photolesions induced RPA-ATR-CHEK1-dependent checkpoints. Moreover, these MutS $\alpha$ -dependent single-stranded photolesions most likely are converted into toxic DSBs during the S phase of the next cell cycle. Why would MutS $\alpha$  initiate excision of the DNA strand opposite a photolesion? As explained above, damaged nucleotides require TLS for (mutagenic) bypass. Our data therefore suggested that MutS $\alpha$  might direct the excision of incorrect nucleotides incorporated by TLS opposite damaged nucleotides. Indeed, whereas loss of MutS $\alpha$  in wild type cells resulted in a strong increase of UV-induced mutations, disruption of MutS $\alpha$  in TLS-defective cells led to only a marginal increase in UV-induced mutation frequencies. In genetic terms, mutagenic TLS and MutS $\alpha$  act in an epistatic fashion. Further evidence for the MutS $\alpha$ -directed excision of TLS errors came from an *in vivo* TLS assay that employs a site-specific photolesion, introduced on a replicating episome. While the absolute efficiency of TLS at the photolesion was similar in MutS $\alpha$ -proficient and MutS $\alpha$ -deficient cells, its mutagenicity was increased considerably in the absence of MutS $\alpha$ . In conclusion, MutS $\alpha$  acts to excise 'misincorporations' by TLS opposite non-instructive photolesions, thereby *a posteriori* controlling its mutagenicity. Consistent with

our results, some evidence exists that MutS $\alpha$  indeed can recognize 'mismatched' non-instructive DNA lesions [7]. Additionally, the ssDNA tracts induced by this excision are associated with the induction of DDR and, during the S phase of the subsequent cell cycle, with DSBs and a consequent apoptotic response (Figure 1). We call this new excision repair pathway, for obvious reasons, post-TLS repair.

Currently, we do not understand how MutS $\alpha$  recognizes such highly aberrant, damaged nucleotide 'mispairs', nor do we know whether also MutL $\alpha$ , the mismatch repair-associated exonuclease EXO1 or other downstream proteins participate in post-TLS repair. These questions are subject to further research.

Niels de Wind: Department of Human Genetics, Leiden University Medical Center, Leiden, The Netherlands

**Correspondence to:** Niels de Wind, **email** [n.de\\_wind@lumc.nl](mailto:n.de_wind@lumc.nl)

**Received:** July 08, 2015

**Published:** July 21, 2015

## REFERENCES

1. Ciccio A. et al. *Molecular Cell*. 2010; 40: 179-204.
2. Elvers I, et al. *Nucleic Acids. Res.* 2011; 39: 7049-7057.
3. Chang D. J, et al. *Nature Chemical Biology*. 2009; 5: 82-90.
4. Tsaalbi-Shtylik A, et al. *The Journal of Cell Biology*. 2015; 209: 33-46.
5. Jiricny J. *Cold Spring Harbor Perspectives in Biology*. 2013; 5: a012633.
6. Young L. C, et al. *The Journal of investigative dermatology*. 2003; 121: 435-440.
7. Wang H, et al. *The Journal of biological chemistry*. 1999; 274: 16894-16900.
